# Supplementary material for: A scoping review to map public-facing websites for non-traumatic wrist disorders with quality evaluation
Source: PubMed Central journal article supplement (PMC11559518; doi:10.1177/17589983241287082), 2024-10-08
Supplement: sj-pdf-1-hth-10.1177_17589983241287082.pdf [file sj-pdf-1-hth-10.1177_17589983241287082.pdf]

**Supplementary section 1.** Lay terms used for Google™ search derived from mixed stakeholder group (1)

- Weak wrist
- Wrist sprain
- Wrist strain
- Wrist pain
- Wrist injury
- Why does my wrist hurt

- 
1. Mitchell T, Hamilton N, Dean B, Rodgers S, Fowler-Davis S, McLean S. A scoping review to map evidence regarding key domains and questions in the management of non-traumatic wrist disorders. *Hand Therapy*. 2023 Dec 12;17589983231219595.
